# Supplementary material for: Agroclimatic analysis for reducing planting risks in Burkina Faso and Senegal
Source: Research Square preprint supplement (doi:10.21203/rs.3.rs-7180722/v1), 2025-08-11
Supplement: Supplementary file 1 [file dc8a7c26251055f23f218d07.docx]

**List of Supplementary Tables:**

Supplementary **Table 1** Major soils for Burkina Faso used in this simulation study.

| Type | Soil depth | LL | DUL | SAT | Bulk density |
| --- | --- | --- | --- | --- | --- |
|  | (cm) | (mm/mm) | (mm/mm) | (mm/mm) | (g/cm3) |
| Loam | 5 | 0.18 | 0.36 | 0.47 | 1.31 |
|  | 15 | 0.18 | 0.36 | 0.44 | 1.39 |
|  | 30 | 0.18 | 0.36 | 0.45 | 1.35 |
|  | 45 | 0.18 | 0.36 | 0.46 | 1.33 |
|  | 60 | 0.18 | 0.36 | 0.45 | 1.35 |
|  | 75 | 0.18 | 0.36 | 0.46 | 1.33 |
|  | 90 | 0.18 | 0.36 | 0.46 | 1.33 |
|  | 105 | 0.16 | 0.33 | 0.43 | 1.40 |
|  | 120 | 0.16 | 0.33 | 0.41 | 1.47 |
| Sandy loam | 5 | 0.13 | 0.20 | 0.29 | 1.49 |
|  | 15 | 0.13 | 0.20 | 0.29 | 1.49 |
|  | 25 | 0.13 | 0.20 | 0.29 | 1.49 |
|  | 34 | 0.12 | 0.23 | 0.32 | 1.41 |
|  | 43 | 0.12 | 0.23 | 0.32 | 1.41 |
|  | 53 | 0.14 | 0.25 | 0.33 | 1.44 |
|  | 64 | 0.14 | 0.25 | 0.33 | 1.44 |
|  | 83 | 0.17 | 0.28 | 0.33 | 1.57 |
|  | 102 | 0.17 | 0.28 | 0.33 | 1.57 |
|  | 123 | 0.18 | 0.29 | 0.33 | 1.59 |
|  | 145 | 0.18 | 0.29 | 0.33 | 1.59 |
| Sandy clay loam | 5 | 0.04 | 0.17 | 0.39 | 1.20 |
|  | 15 | 0.04 | 0.17 | 0.39 | 1.20 |
|  | 25 | 0.04 | 0.17 | 0.39 | 1.20 |
|  | 33 | 0.04 | 0.18 | 0.36 | 1.20 |
|  | 46 | 0.06 | 0.17 | 0.40 | 1.20 |
|  | 61 | 0.15 | 0.29 | 0.38 | 1.20 |
|  | 76 | 0.15 | 0.29 | 0.38 | 1.20 |
|  | 106 | 0.15 | 0.29 | 0.38 | 1.20 |
|  | 136 | 0.15 | 0.29 | 0.38 | 1.20 |

LL, lower limit; DUL, drainage upper limit; SAT, water content at saturation;

Supplementary **Table 2** Soil profile used for Senegal in this simulation study.

| Type | Soil depth | LL | DUL | SAT | Bulk density |
| --- | --- | --- | --- | --- | --- |
|  | (cm) | (mm/mm) | (mm/mm) | (mm/mm) | (g/cm3) |
| Sand | 5 | 0.031 | 0.097 | 0.32 | 1.61 |
|  | 15 | 0.031 | 0.097 | 0.32 | 1.61 |
|  | 30 | 0.037 | 0.119 | 0.331 | 1.66 |
|  | 45 | 0.037 | 0.117 | 0.332 | 1.54 |
|  | 60 | 0.037 | 0.117 | 0.332 | 1.54 |
|  | 90 | 0.04 | 0.126 | 0.331 | 1.57 |
|  | 120 | 0.037 | 0.117 | 0.331 | 1.55 |
|  | 150 | 0.037 | 0.119 | 0.33 | 1.64 |
|  | 180 | 0.037 | 0.119 | 0.331 | 1.58 |
|  | 210 | 0.034 | 0.108 | 0.324 | 1.6 |

LL, lower limit; DUL, drainage upper limit; SAT, water content at saturation

**List of supplementary Figures**


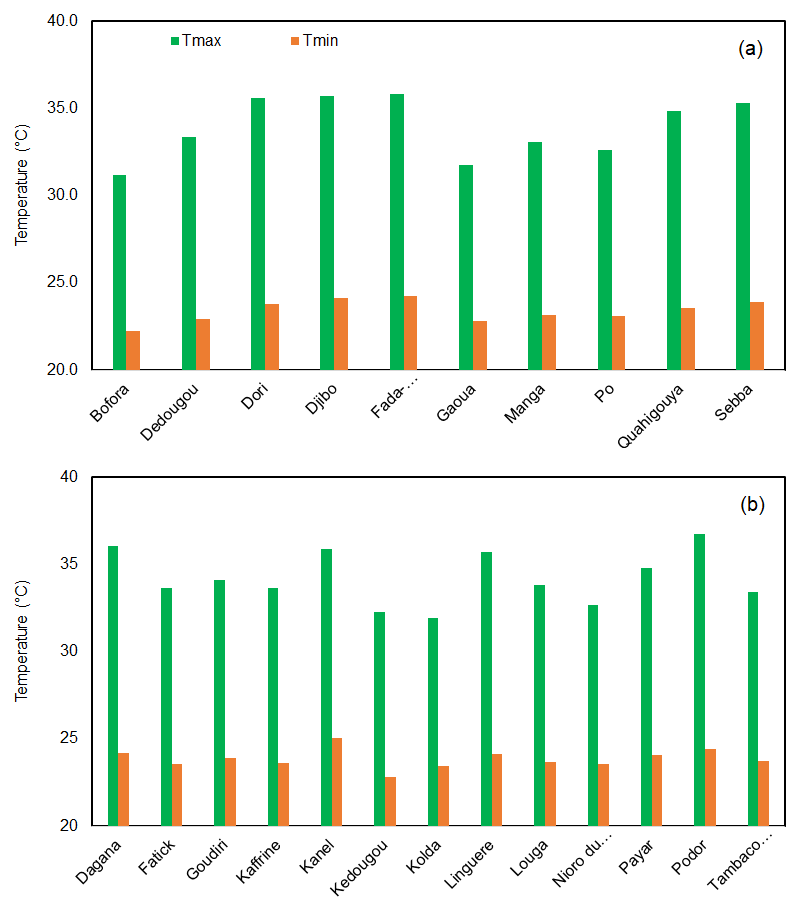


**Supplementary Fig. 1**. Average maximum and minimum temperatures under the baseline climate (1981 – 2020) for different locations in (a) Burkina Faso and (b) Senegal.


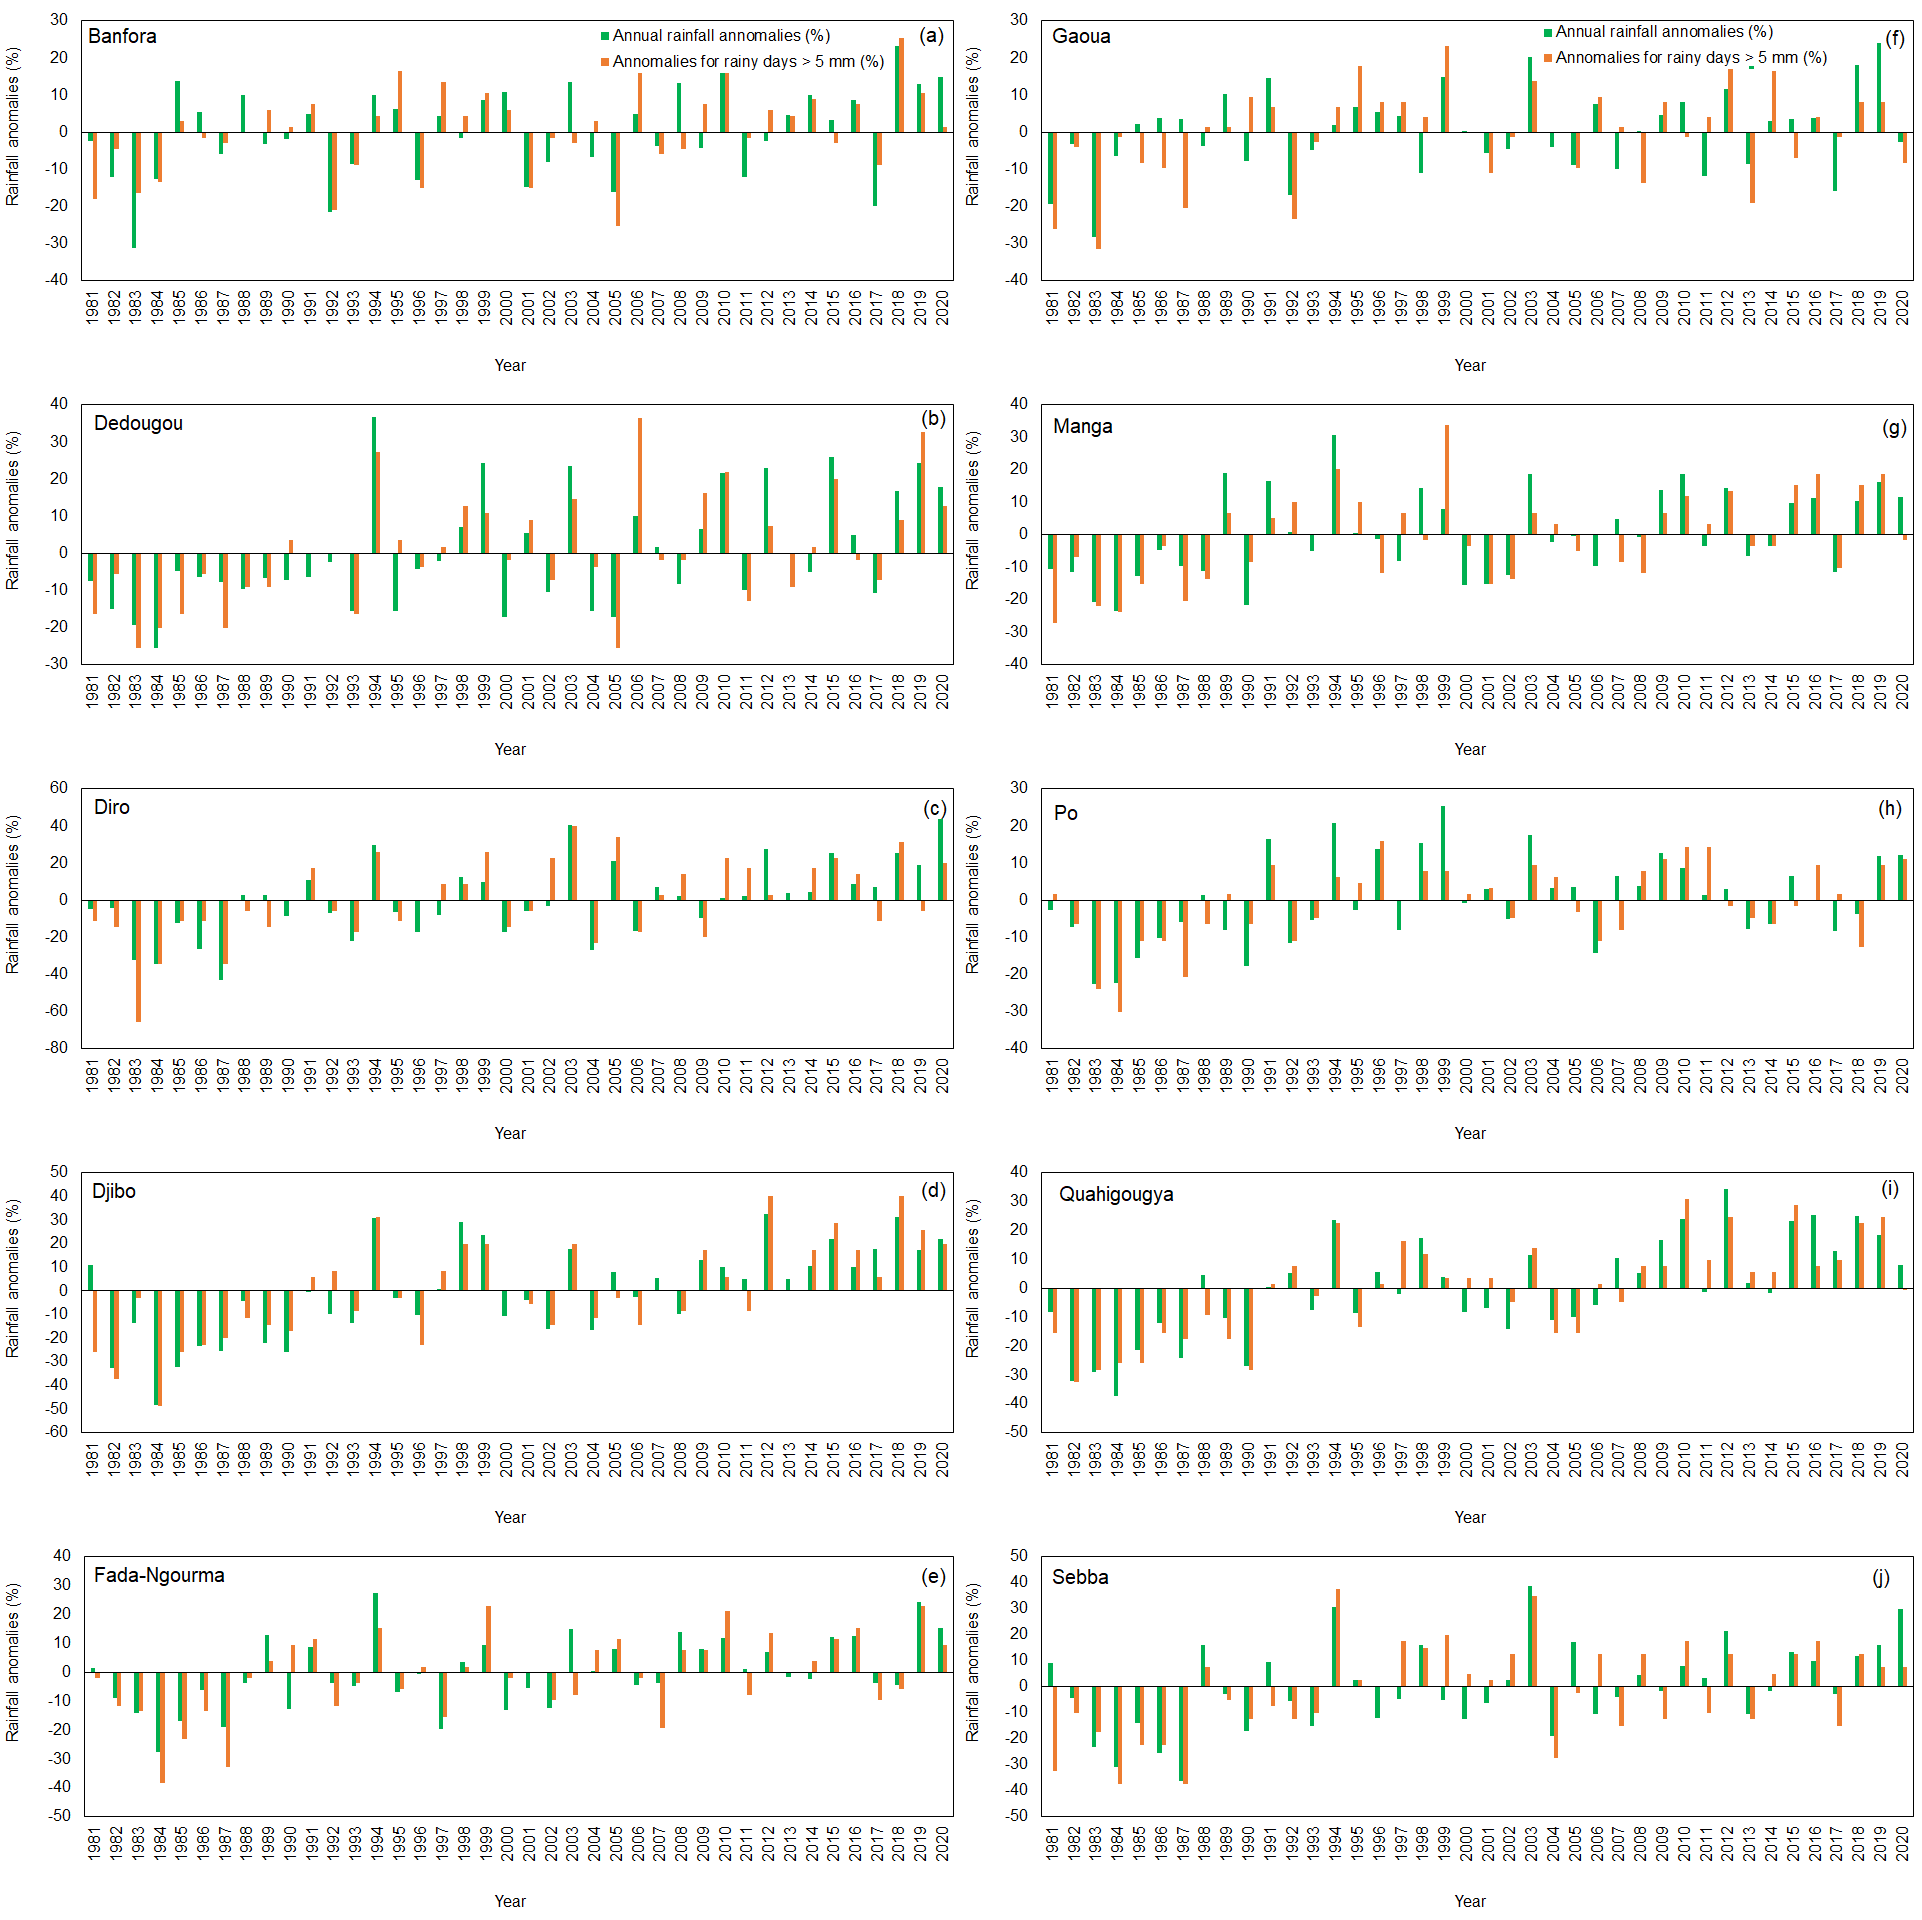


**Supplementary Fig. 2**. Annual rainfall and rainy days above 5 mm rainfall variabilities for different locations in Burkina Faso for the period of 1981–2020.


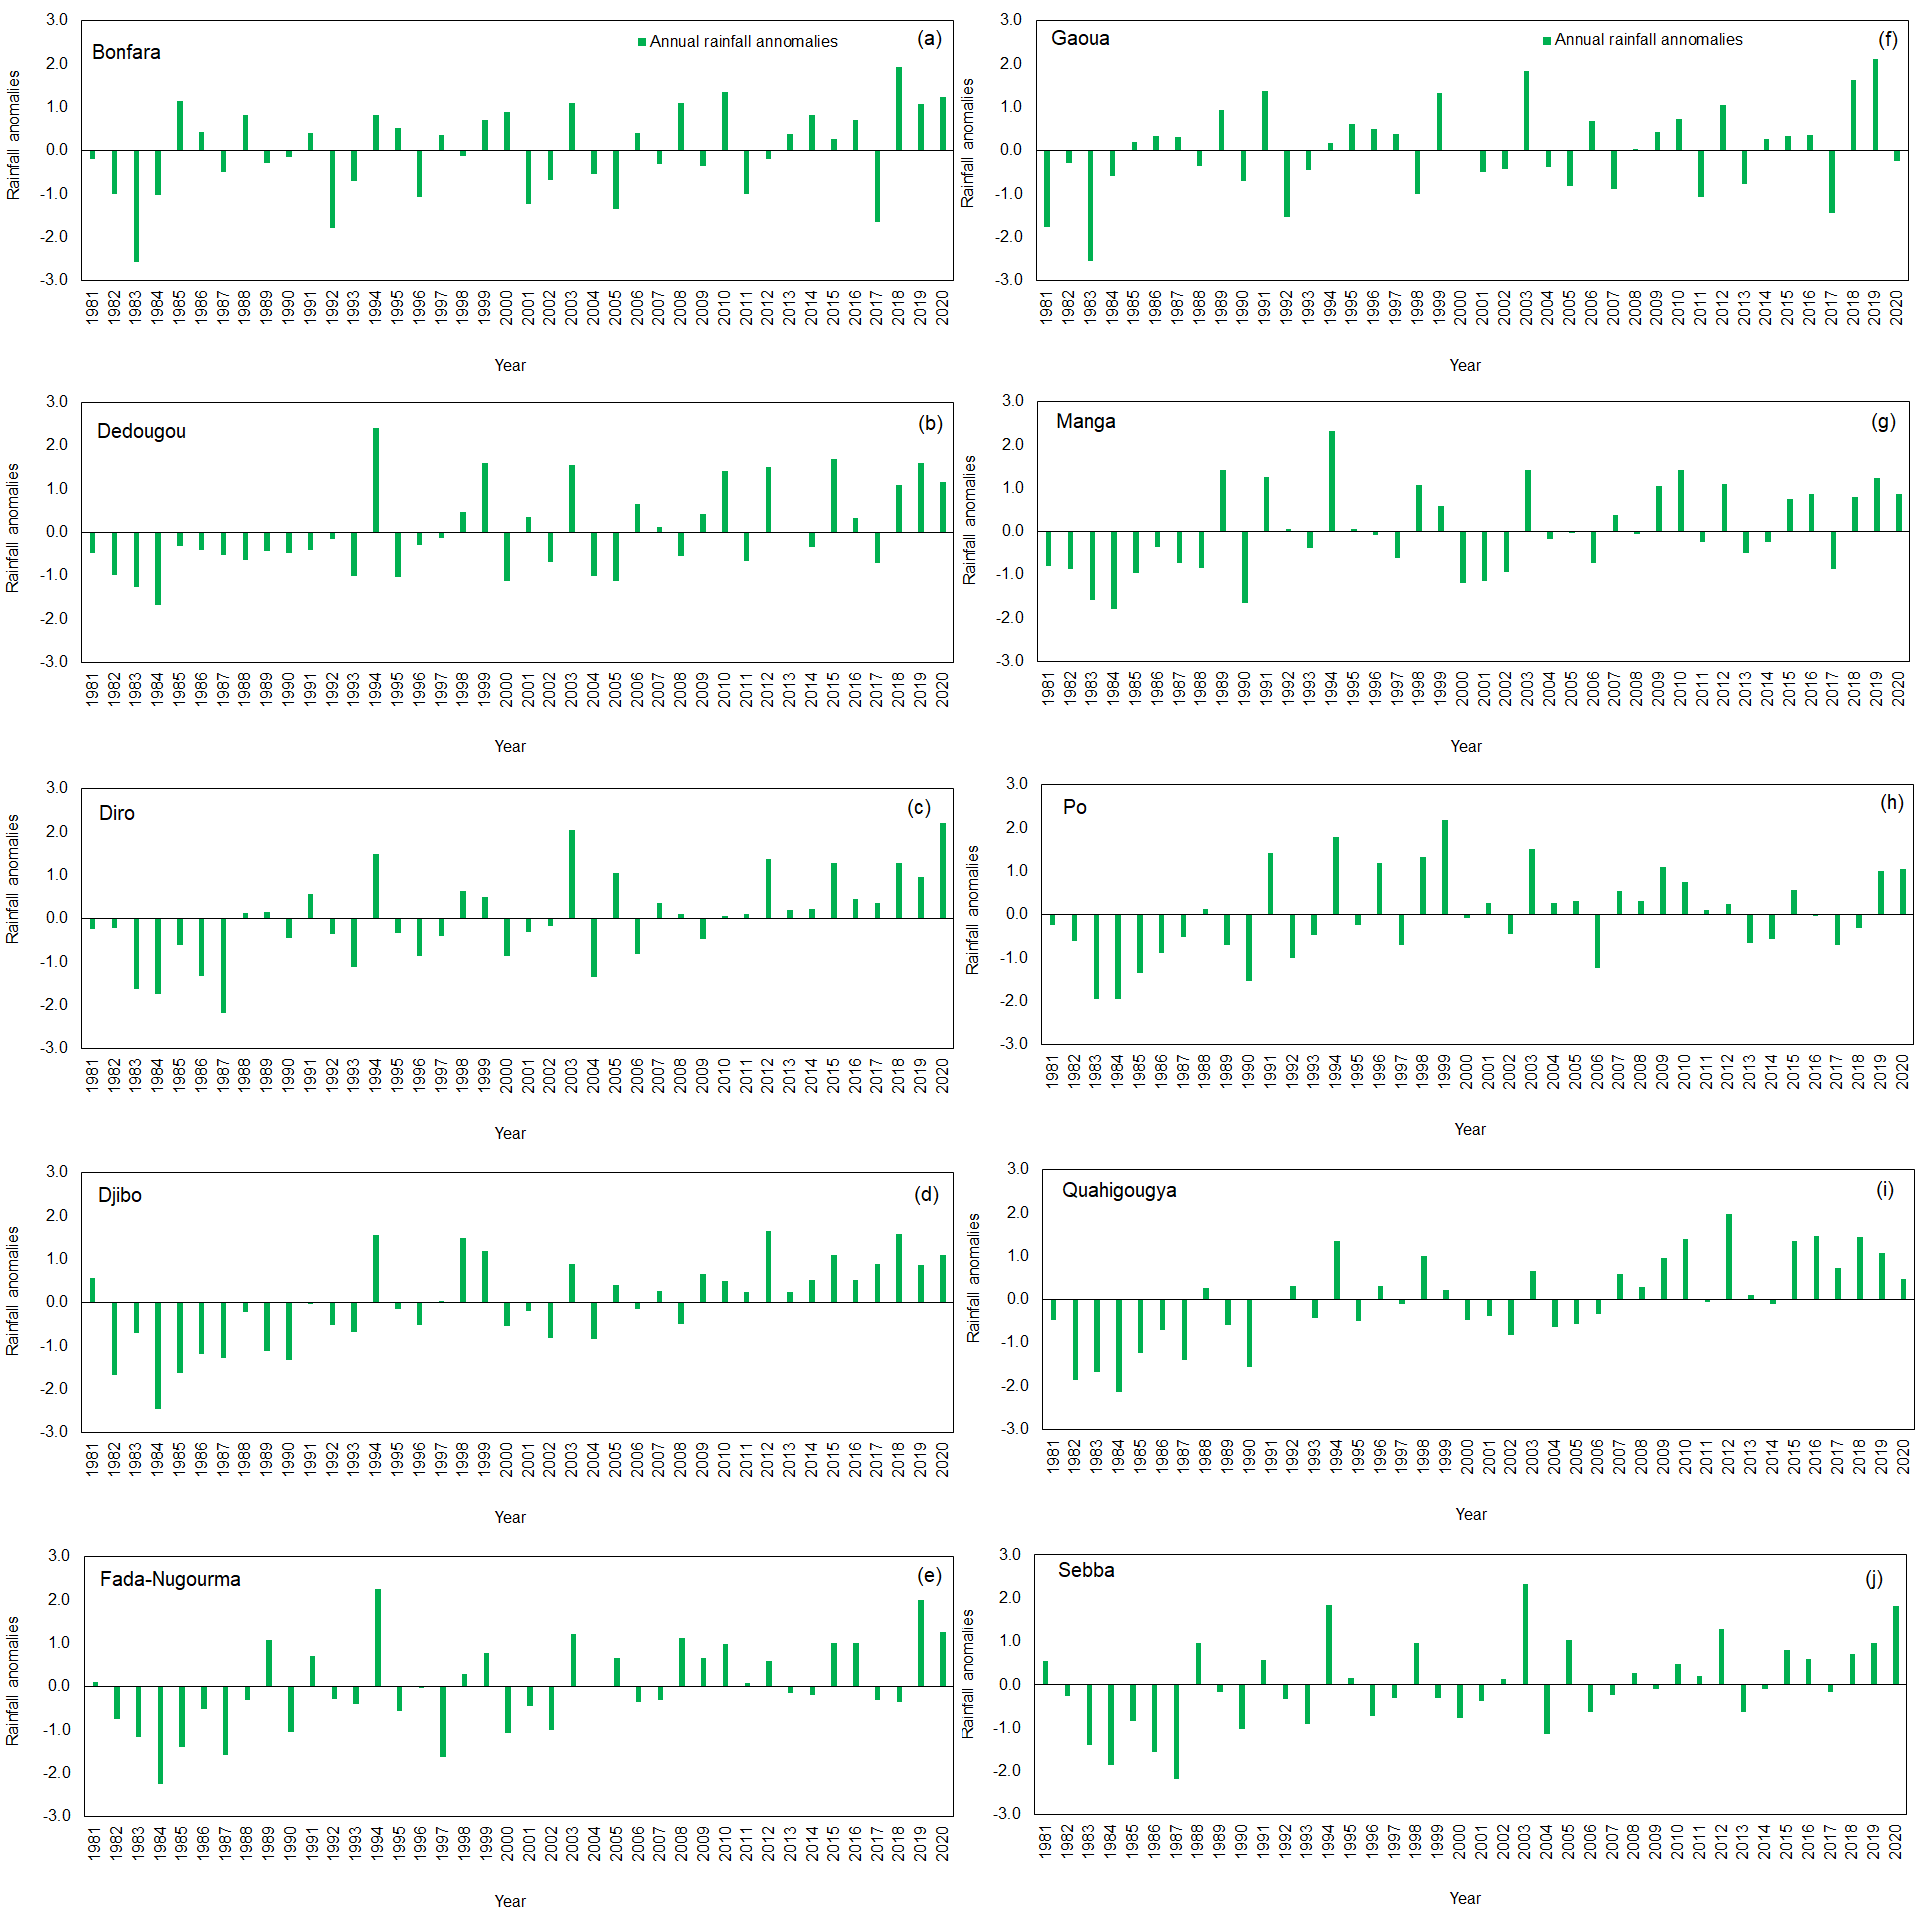


**Supplementary Fig. 3**. Standardized annual rainfall anomalies for different locations in Burkina Faso for the period of 1981–2020.


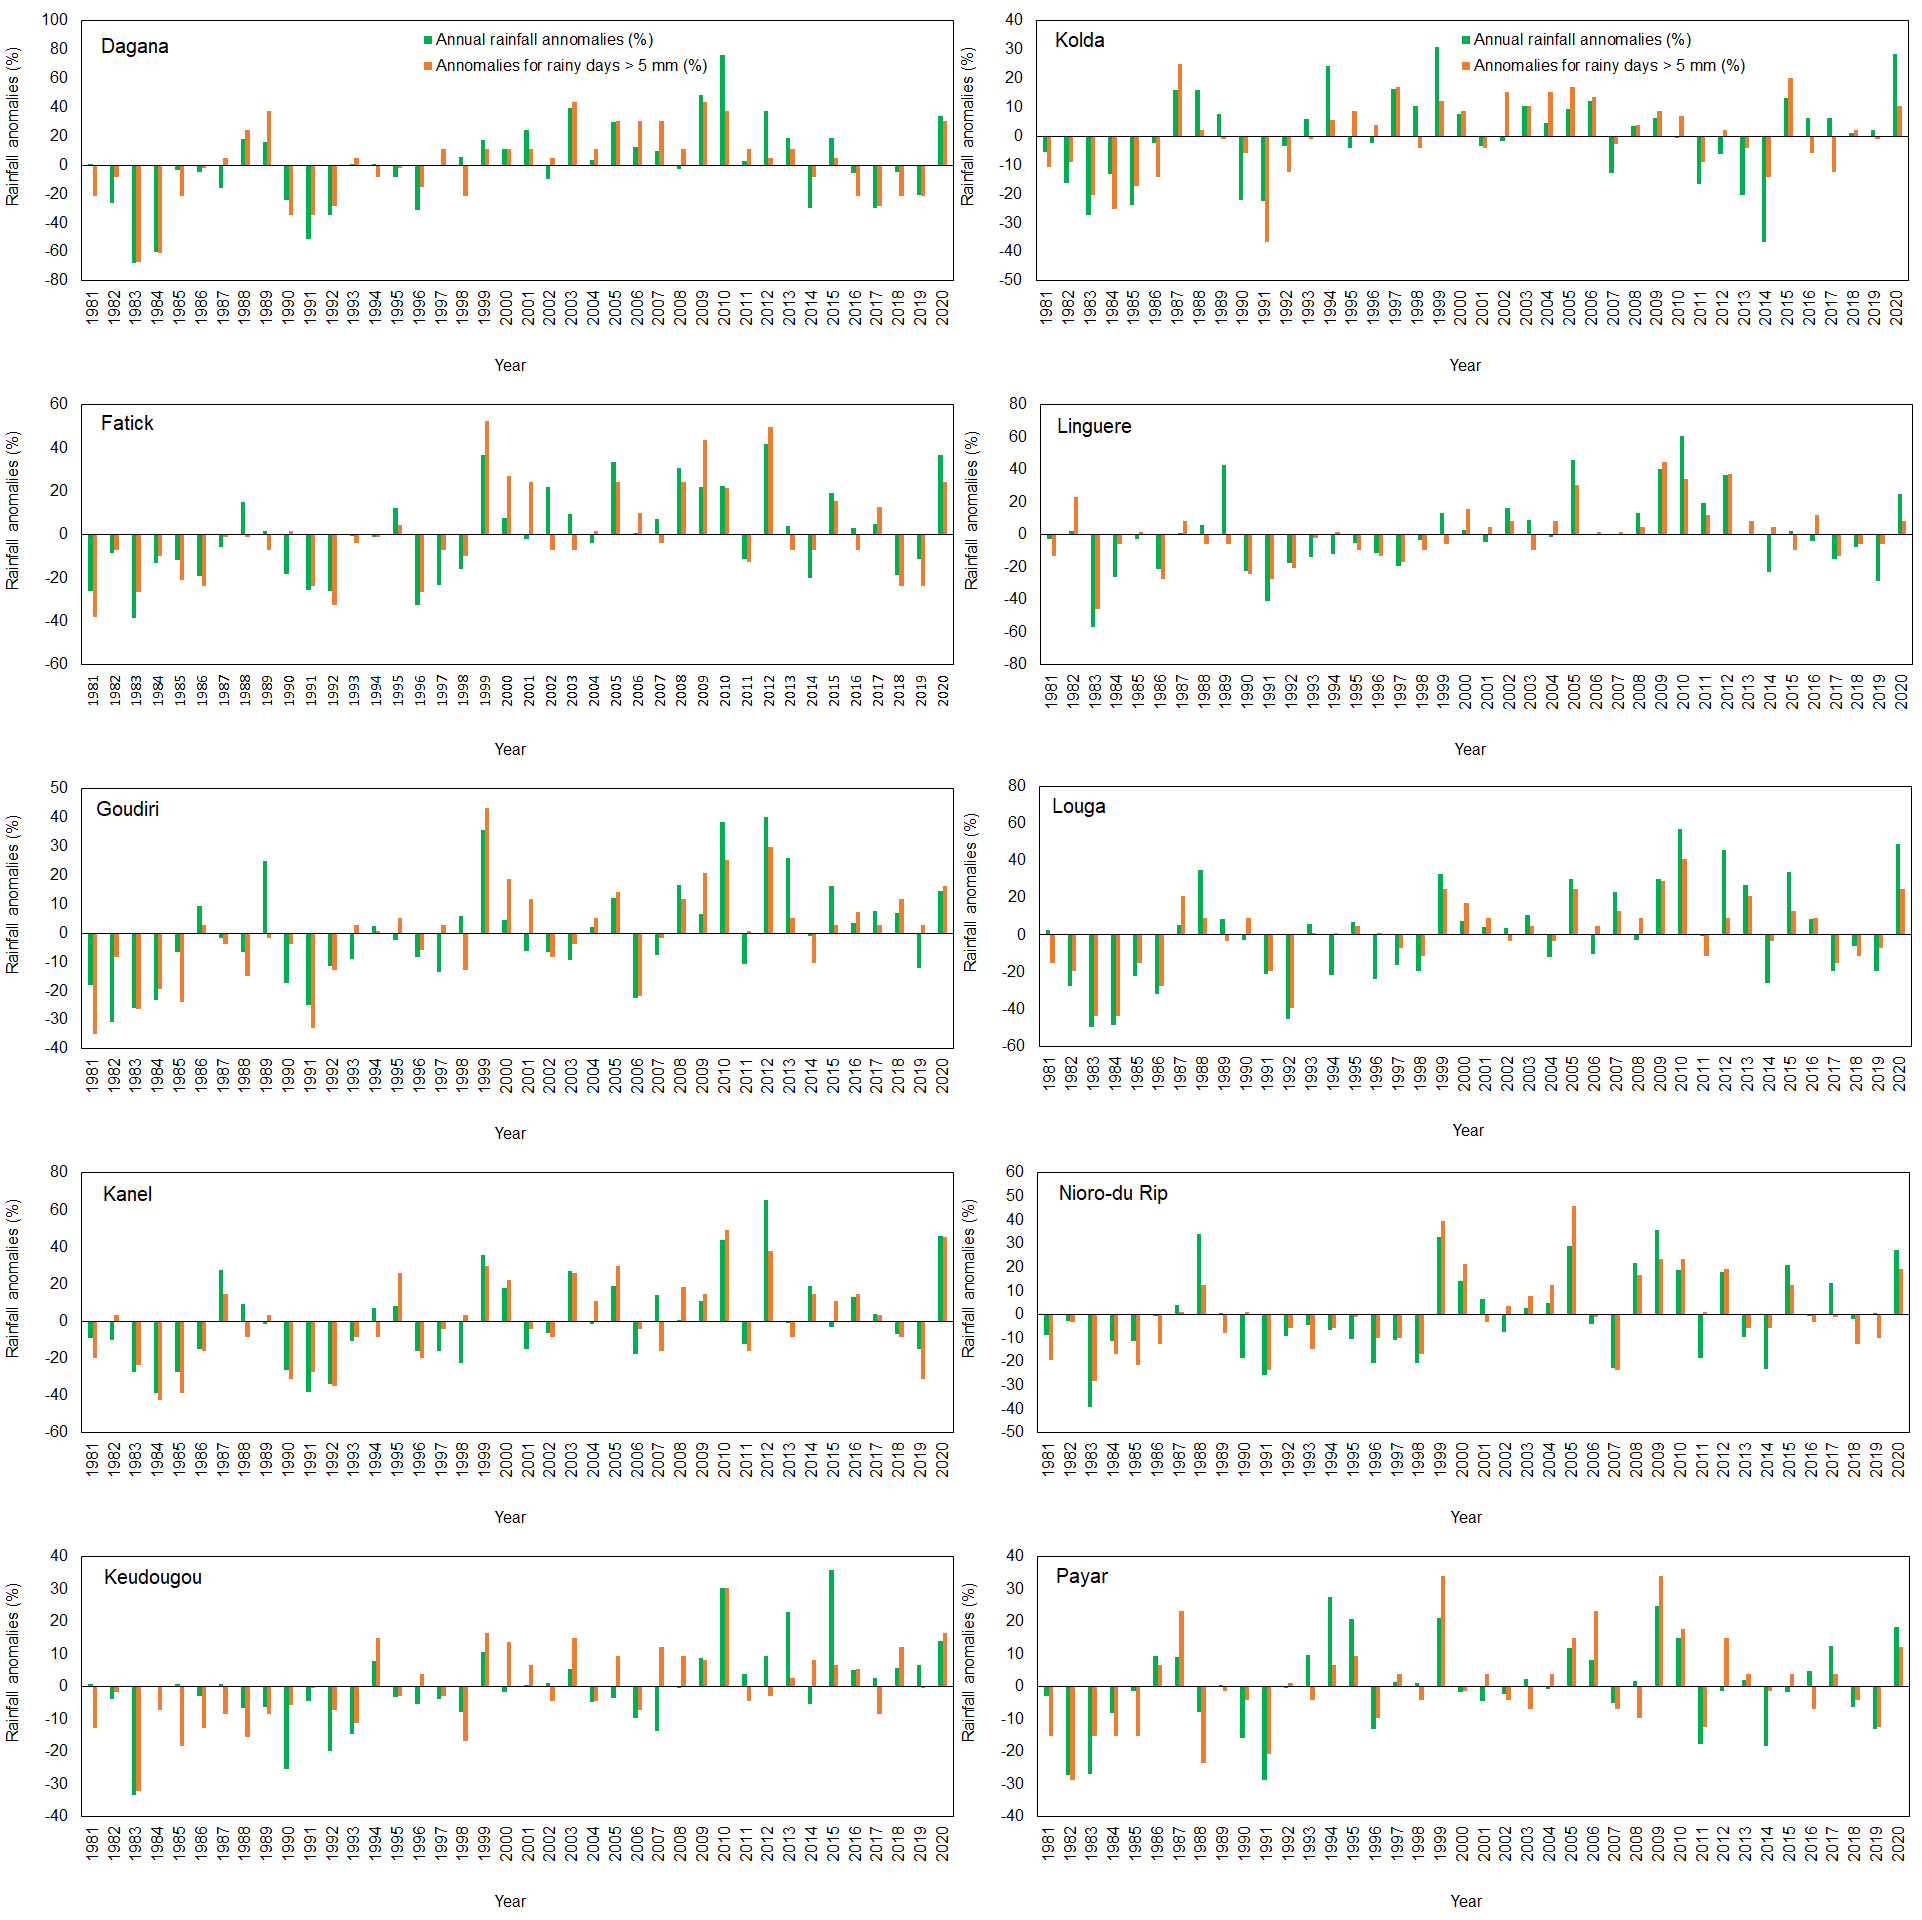


**Supplementary Fig. 4**. Annual rainfall and rainy days above 5 mm rainfall variabilities for different locations in Senegal for the period of 1981–2020.


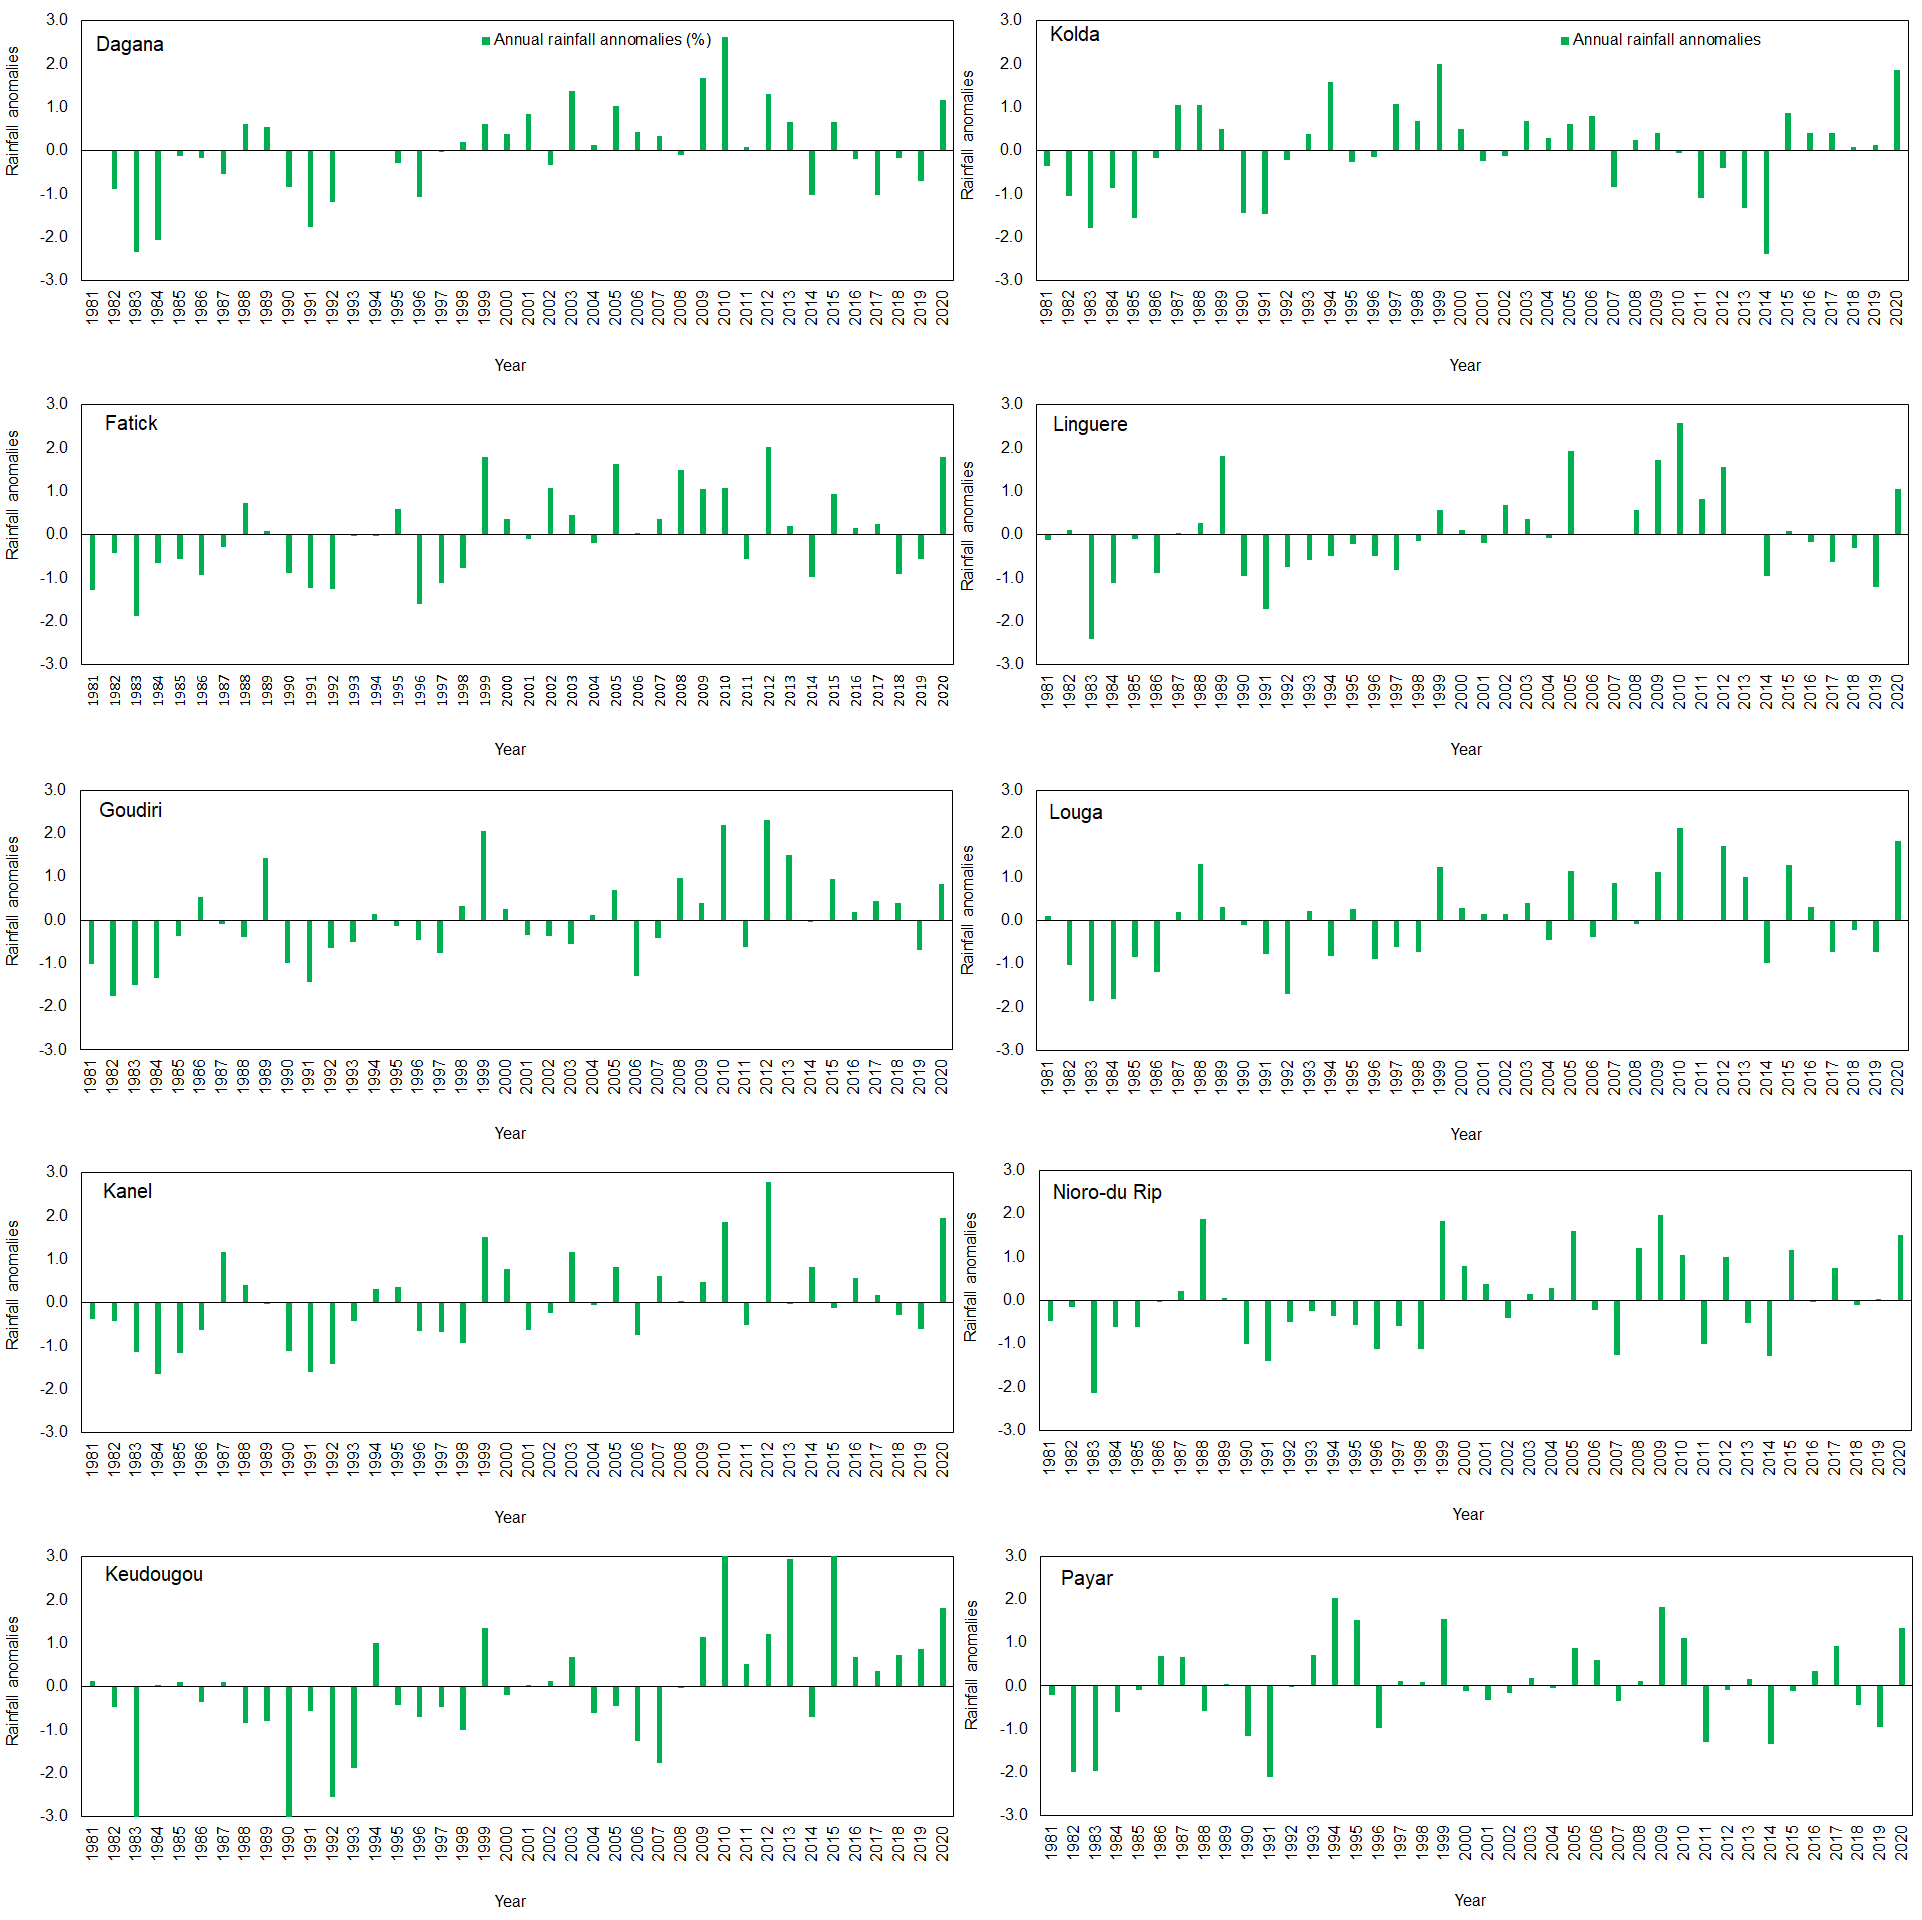


**Supplementary Fig. 5**. Standardized annual rainfall anomalies for different locations in Senegal for the period of 1981–2020.


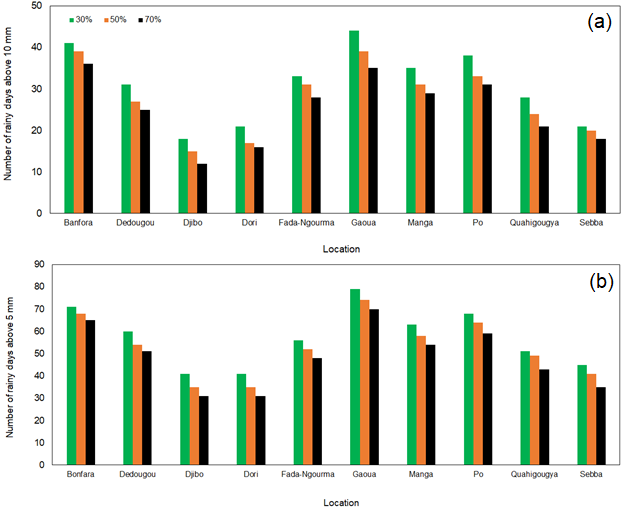


**Supplementary Fig. 6**. The 30%, 50% and 70% probabilities of exceedance of number of rainy days equal or above 10 mm (a) and 5 mm (b) for selected locations in Burkina Faso for the growing seasons of 1981–2020.


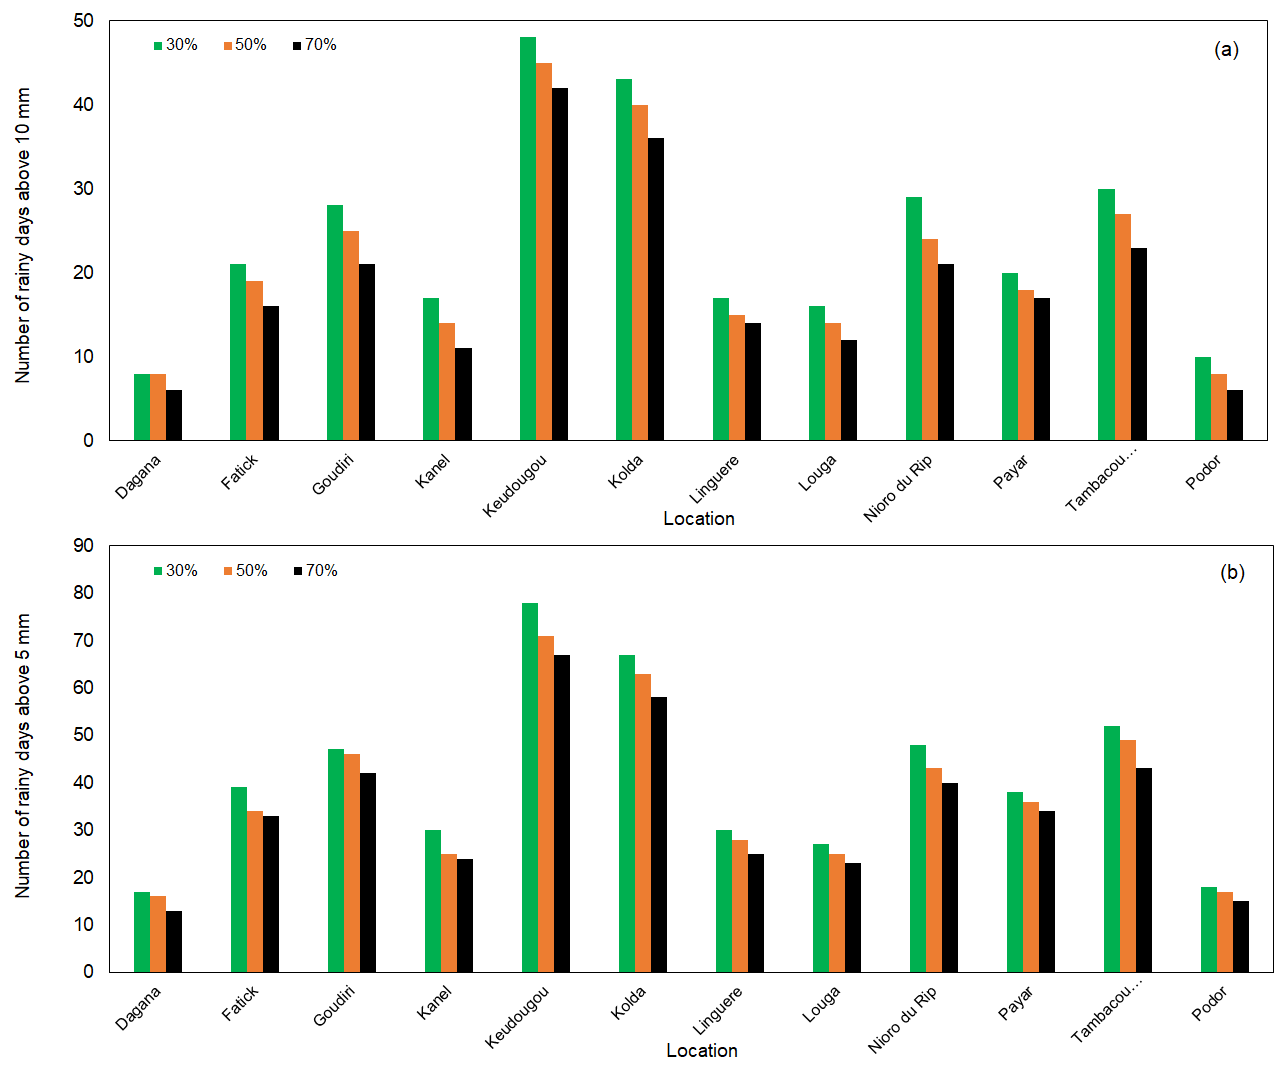


**Supplementary Fig. 7**. The 30%, 50% and 70% probabilities of exceedance of number of rainy days equal or above 10 mm (a) and 5 mm (b) for selected locations in Senegal for the growing season periods of 1981–2020.


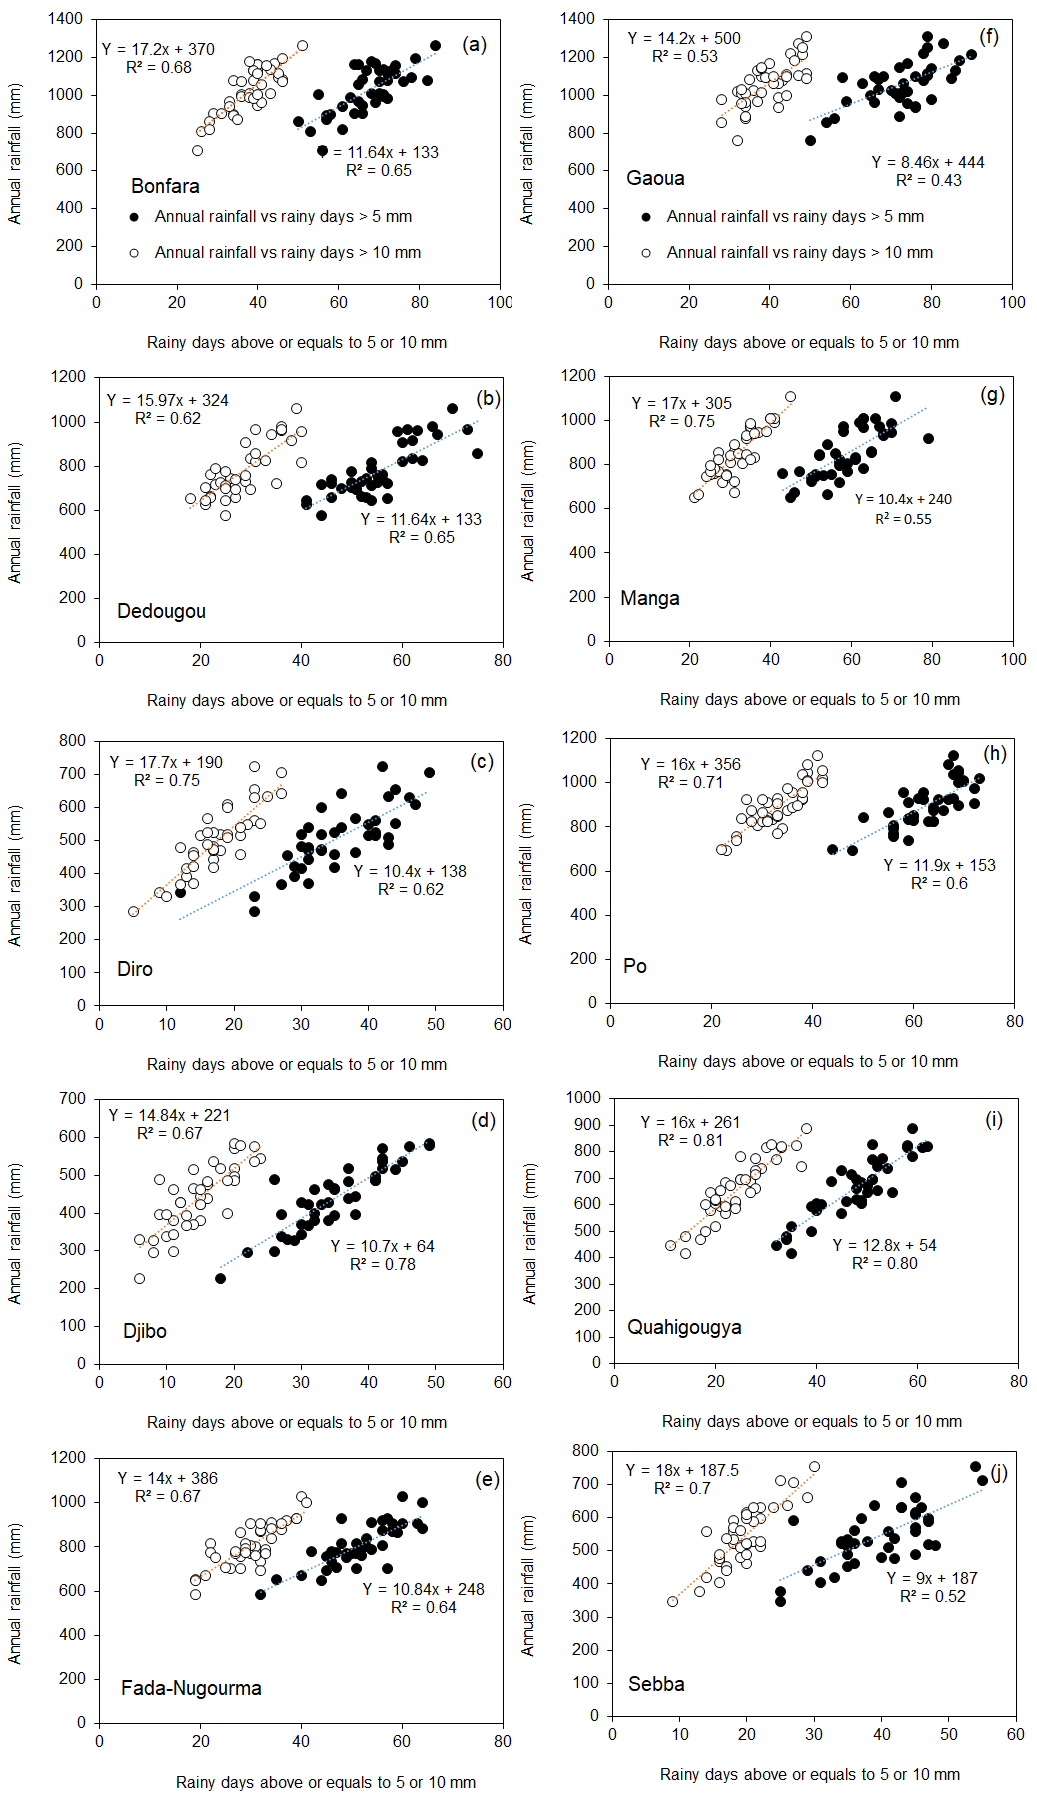


**Supplementary Fig. 8**. The relationship between annual rainfall and number of rainy days above 10 or 5 mm for different locations in Burkina Faso.


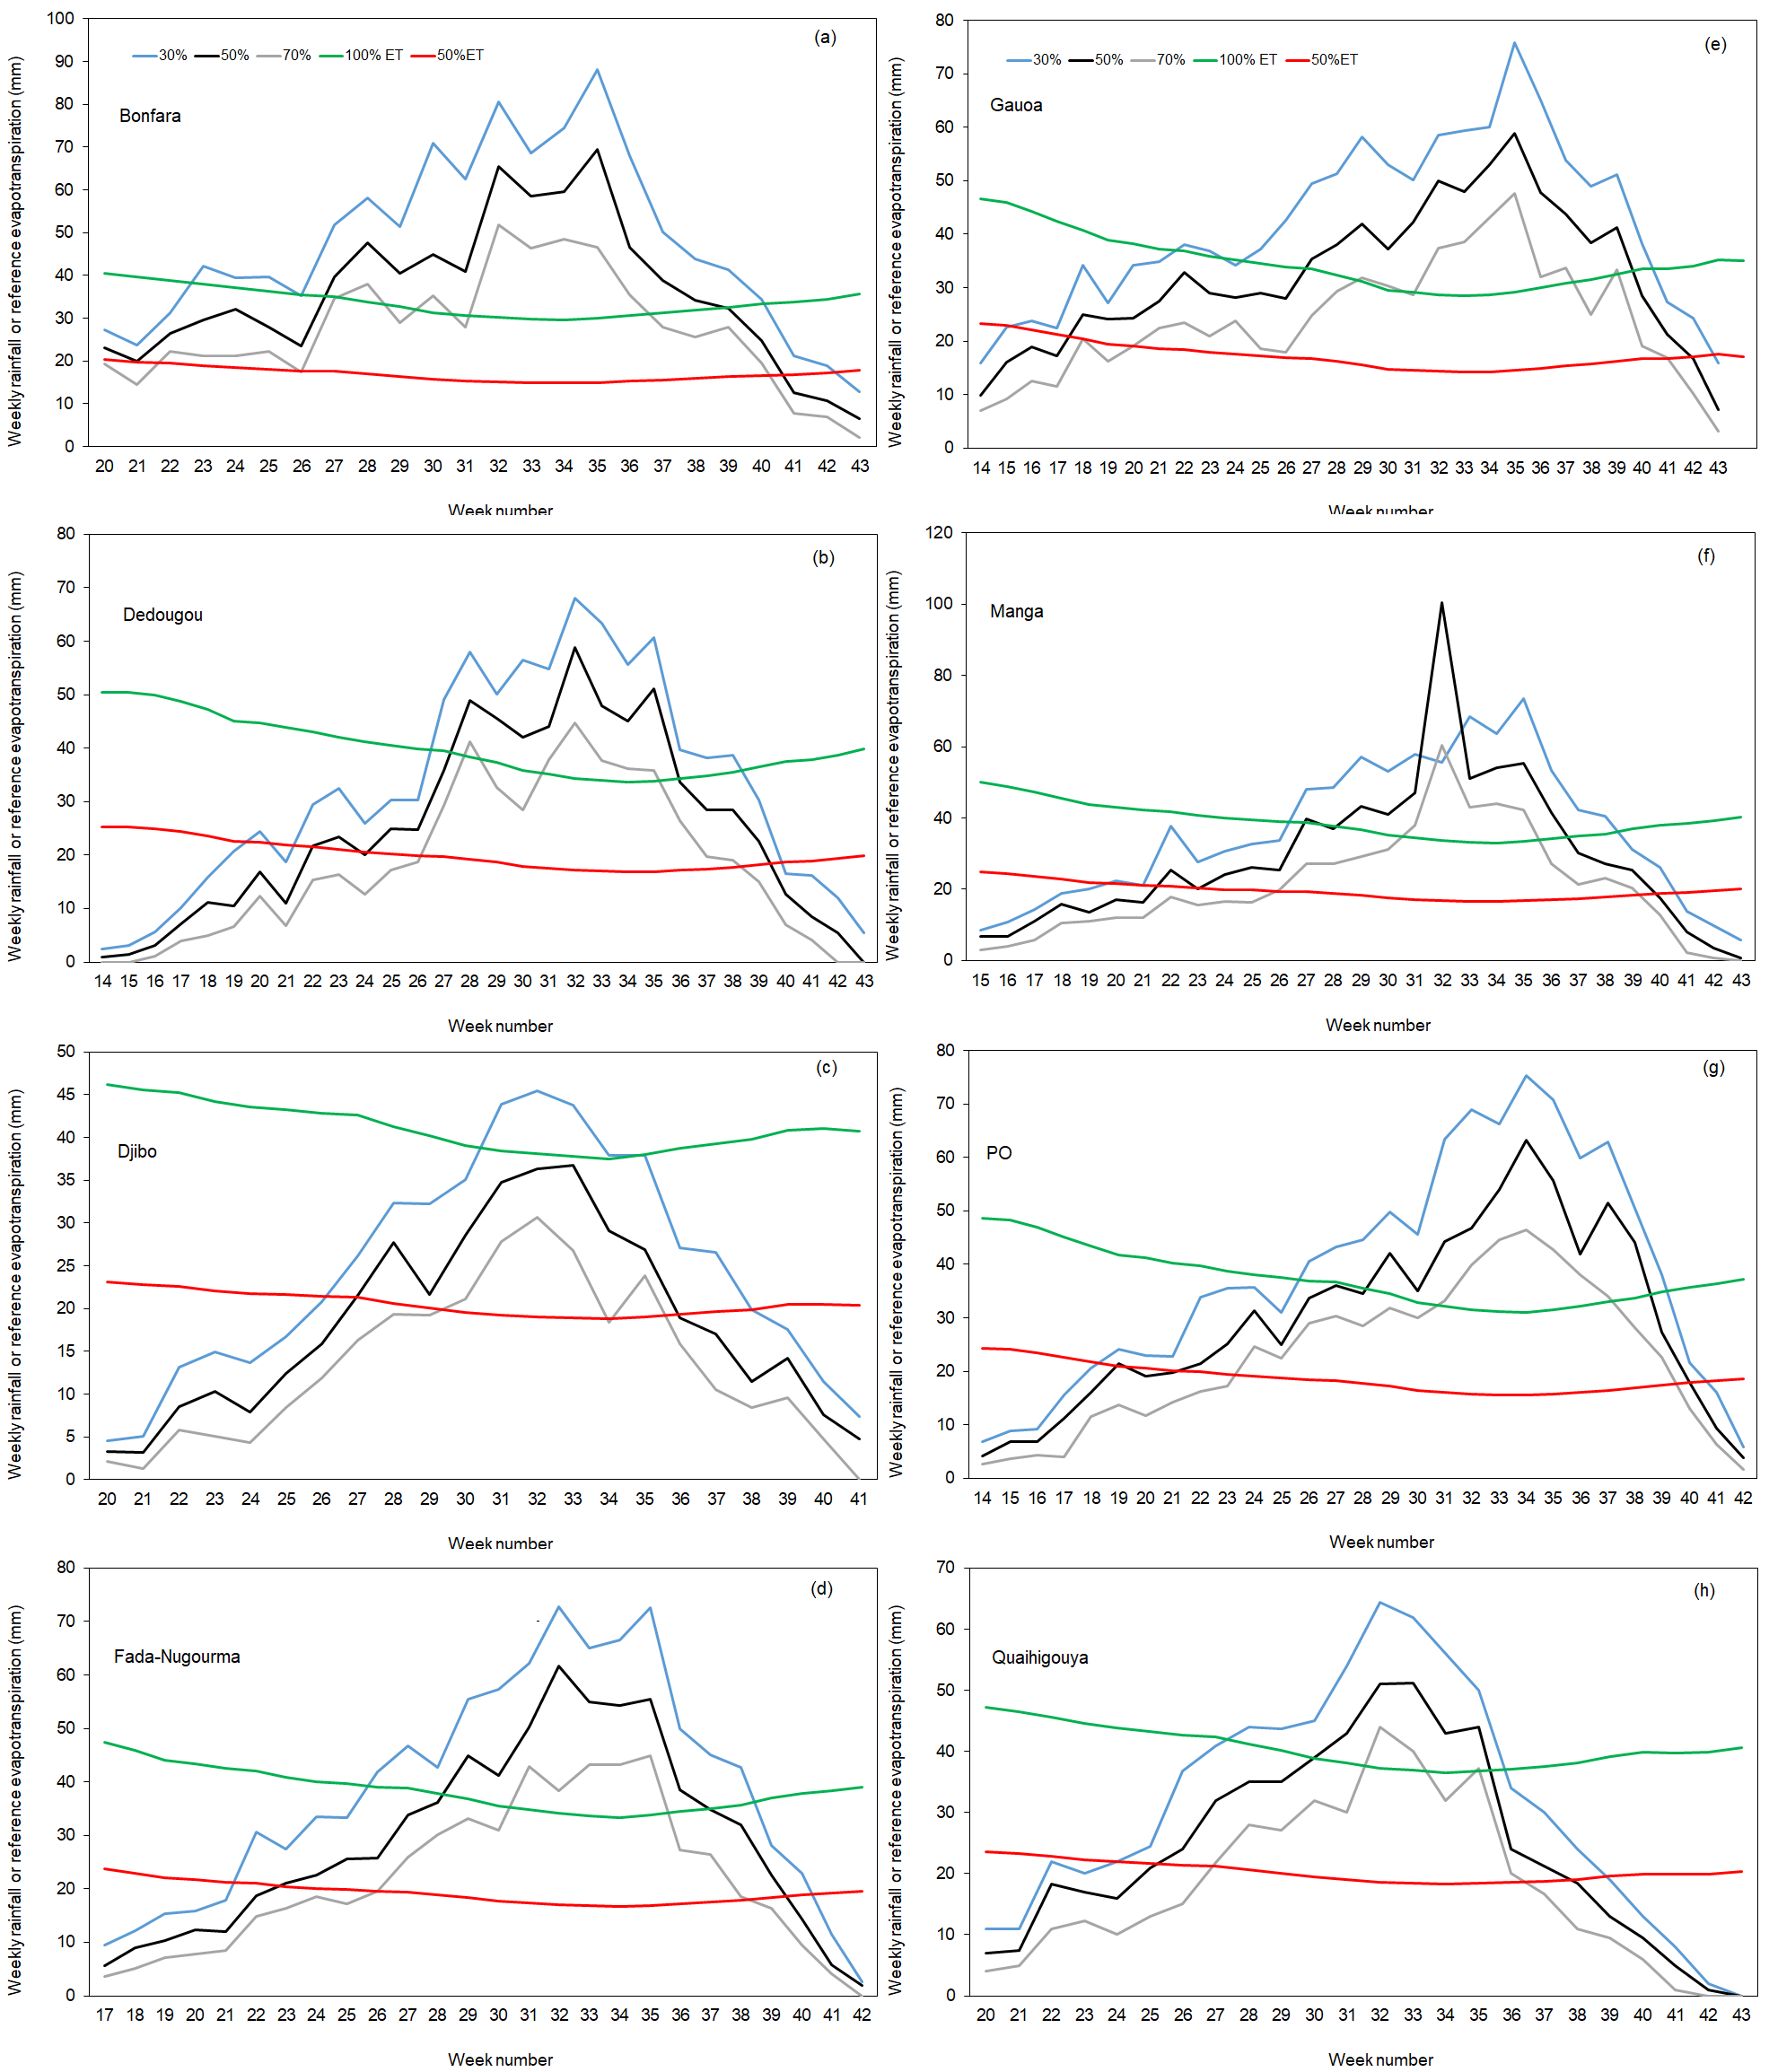


**Supplementary Fig. 9**. Rain onset, cessation and length of growing period (LGP) based on weekly rainfall versus weekly reference evapotranspiration for different locations in Burkina Faso.


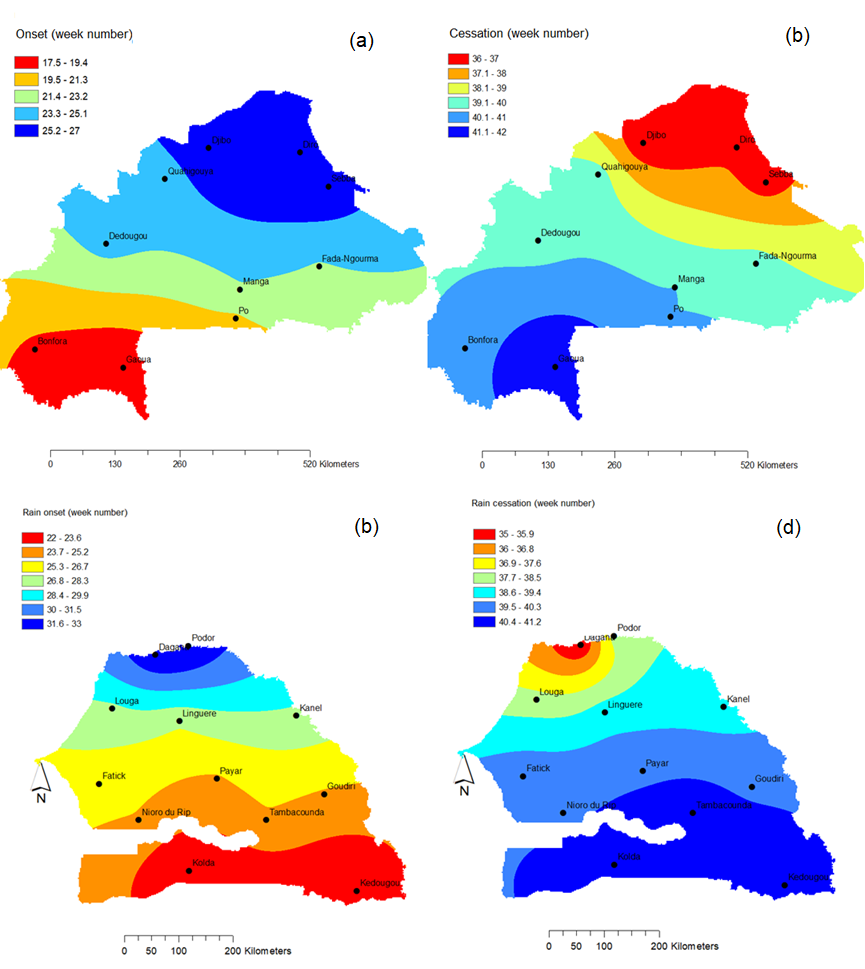


**Supplementary Fig. 10**. Average onset based on 50% rain onset (P2) (a) and cessation (b) for Burkina Faso locations; P2 (c) and cessation (d) for Senegal based on climate data for the period of 1981–2020.


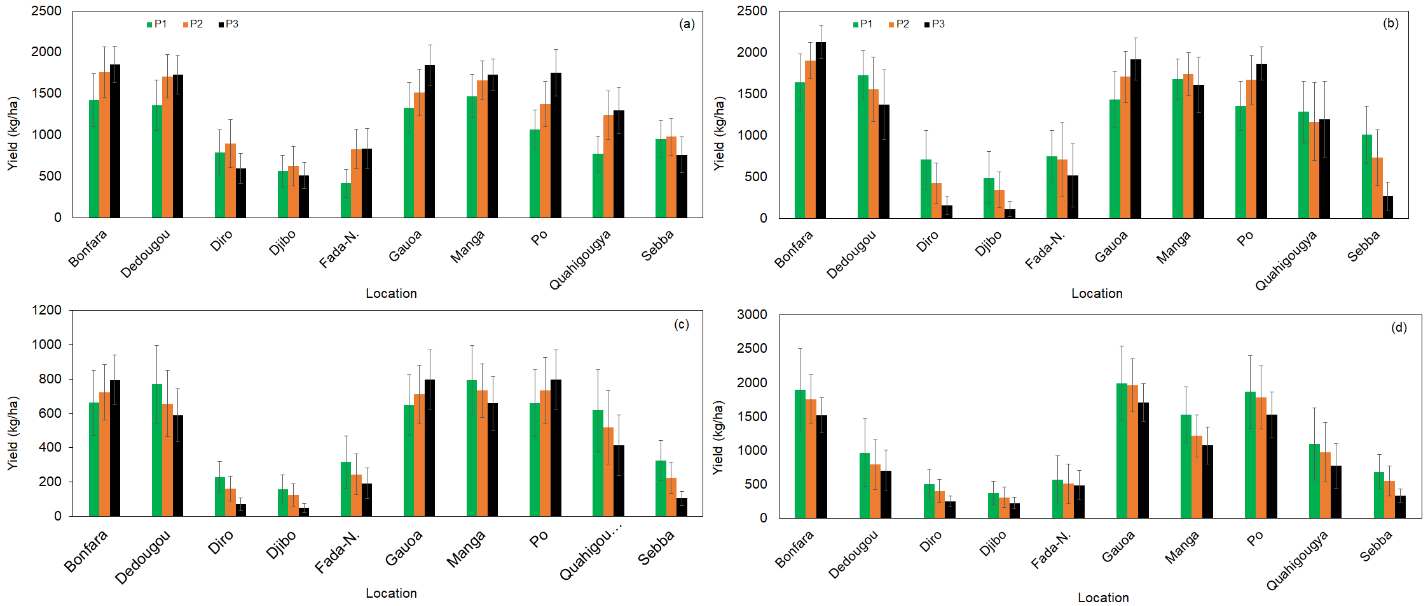


**Supplementary Fig. 11.** Simulated yield of maize (a), millet (b), peanut (c), and sorghum (d) for selected Burkina Faso locations for the period of 1981–2005.


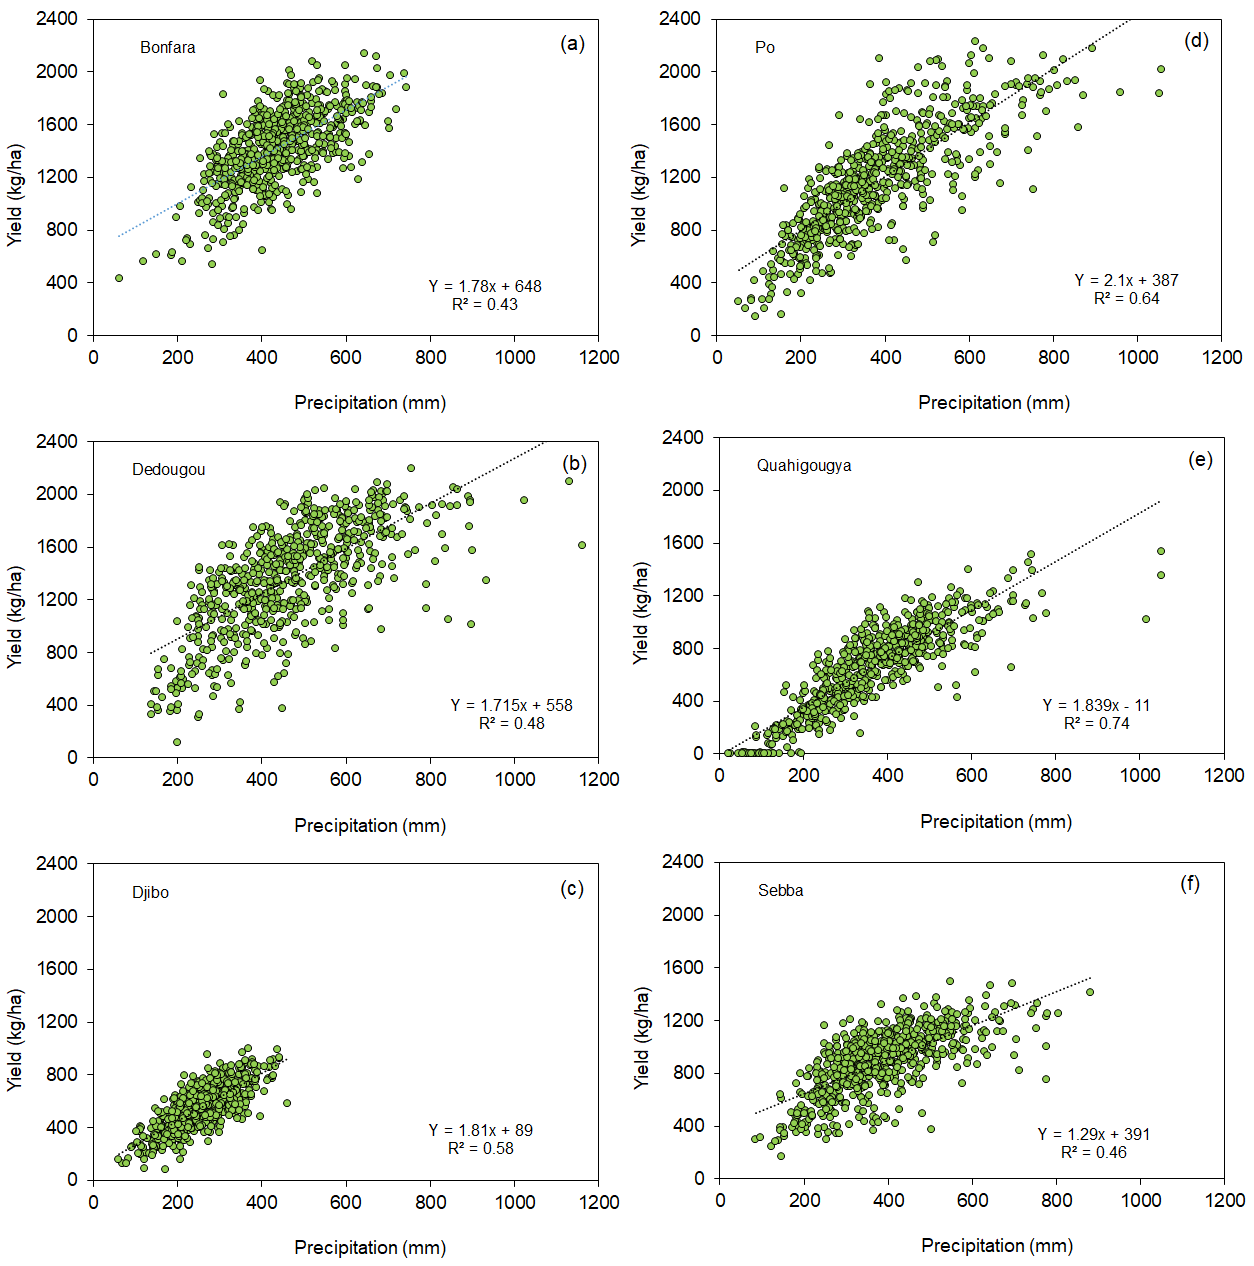


**Supplementary Fig. 12.** The relationship between seasonal precipitation and yield of maize for selected locations in Burkina Faso during the period of 1981–2005
